# Supplementary material for: Coupling the high-complexity land surface model ACASA to the mesoscale model WRF
Source: Copernicus journal article supplement (doi:10.5194/gmd-7-2917-2014), 2014-12-10
Supplement: Supplementary file 1 [file gmd-7-2917-2014-supplement.pdf]

Supplement of Geosci. Model Dev., 7, 2917–2932, 2014  
<http://www.geosci-model-dev.net/7/2917/2014/>  
doi:10.5194/gmd-7-2917-2014-supplement  
© Author(s) 2014. CC Attribution 3.0 License.

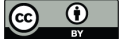

*Supplement of*

## **Coupling the high-complexity land surface model ACASA to the mesoscale model WRF**

**L. Xu et al.**

*Correspondence to:* L. Xu (liyixm@mit.edu)

## Statistical Analysis for 13 ARB Air Basins

Table S1 presents the statistical analysis of the WRF-ACASA and WRF-NOAH near-surface temperature outputs for each of California's 13 basins. Statistical values of R-square value, Root Mean Square Error (RMSE), and Degree of Agreement are calculated for each of the basin for each of four seasons. The Coefficient of Determination or (R-square) represents the correlation of the model simulation with the surface observation. The RMSE shows the relative errors of the model simulation against the observation, while the Degree of Agreement is a statistical method to assess the agreement between the model simulations with the surface observation.

Overall, both of the models have a high degree of agreement with all 700 observation stations within the 13 ARB basins during winter, spring, and autumn. The dry summer season is more problematic than the other seasons for both of the models and more so for the WRF-ACASA model over coastal regions such as South Coast, San Diego, and San Francisco basins. This is most noticeable in the RMSE values for WRF-ACASA over the low vegetated regions of Great Basin Valley (GBV), Salton Sea (SS), and San Diego (SD), which increased dramatically during the warm season. While the Degree of Agreement for the San Francisco Basin (SFB) during the wintertime is high with values above 0.8 for both models, the R-square values show that there is little correlation between the model simulations and the surface observations. It could be due to the small range of observation data. Overall, the temperature simulations from both models agree well with the observations where the Degree of Agreement is high. Previous examination on a station-by-station basis also reveals that there is a mismatch in vegetation cover between what is in the WRF models and the actual land surface at the station (e.g., the Mountain County station from Table 2). These mismatches introduce errors that are not due to model physics, and they contribute to some of the low R-square and high RMSE values in the collective study.

Basin: South Central Coast (SCC), San Joaquin Valley (SJV), North Central Coast (NCC), South Coast (SC), Sacramento Valley (SV), San Diego county (SD), Great Basin Valleys (GBV), San Francisco Bay(SFB), Salton Sea (SS), Northeast Plateau (NEP), Mojave Desert (MD), Mountain Counties (MC), North Coast (NC)

Season: winter (DJF), spring (MAM), summer (JJA), fall (SON)

**Table S1.** Statistical Analysis of air temperature for all 13 Air Basins in the Air Resources Board meteorological stations network.

| Season | Basin | R <sup>2</sup> |           | RMSE     |           | Degree of Agreement |           |
|--------|-------|----------------|-----------|----------|-----------|---------------------|-----------|
|        |       | WRF-NOAH       | WRF-ACASA | WRF-NOAH | WRF-ACASA | WRF-NOAH            | WRF-ACASA |
| DJF    | SCC   | 0.832          | 0.717     | 1.739    | 2.470     | 0.917               | 0.822     |
| MAM    | SCC   | 0.984          | 0.806     | 1.322    | 2.090     | 0.987               | 0.911     |
| JJA    | SCC   | 0.604          | 0.533     | 2.039    | 2.211     | 0.931               | 0.900     |
| SON    | SCC   | 0.818          | 0.845     | 1.794    | 1.704     | 0.935               | 0.952     |
| DJF    | SJV   | 0.997          | 0.944     | 1.493    | 1.550     | 0.997               | 0.970     |
| MAM    | SJV   | 0.989          | 0.983     | 1.812    | 1.703     | 0.992               | 0.992     |
| JJA    | SJV   | 0.981          | 0.790     | 2.245    | 2.775     | 0.975               | 0.711     |
| SON    | SJV   | 0.996          | 0.836     | 1.956    | 2.840     | 0.997               | 0.887     |
| DJF    | NCC   | 0.739          | 0.625     | 1.434    | 2.153     | 0.886               | 0.704     |
| MAM    | NCC   | 0.977          | 0.805     | 1.216    | 1.659     | 0.988               | 0.953     |
| JJA    | NCC   | 0.891          | 0.796     | 1.917    | 1.789     | 0.968               | 0.947     |
| SON    | NCC   | 0.945          | 0.962     | 1.532    | 1.168     | 0.965               | 0.986     |
| DJF    | SC    | 0.967          | 0.913     | 1.882    | 1.647     | 0.966               | 0.949     |
| MAM    | SC    | 0.993          | 0.982     | 1.553    | 1.371     | 0.993               | 0.990     |
| JJA    | SC    | 0.589          | 0.581     | 2.064    | 3.495     | 0.832               | 0.596     |
| SON    | SC    | 0.980          | 0.711     | 1.891    | 2.406     | 0.989               | 0.832     |
| DJF    | SV    | 0.986          | 0.926     | 1.129    | 1.281     | 0.991               | 0.965     |
| MAM    | SV    | 0.981          | 0.981     | 1.294    | 1.214     | 0.988               | 0.992     |
| JJA    | SV    | 0.998          | 0.753     | 1.644    | 2.453     | 0.998               | 0.677     |
| SON    | SV    | 0.998          | 0.881     | 1.469    | 2.098     | 0.998               | 0.919     |
| DJF    | SD    | 0.951          | 0.764     | 1.469    | 1.986     | 0.967               | 0.858     |
| MAM    | SD    | 0.966          | 0.927     | 1.154    | 1.265     | 0.976               | 0.974     |
| JJA    | SD    | 0.487          | 0.555     | 2.057    | 3.649     | 0.769               | 0.613     |
| SON    | SD    | 0.876          | 0.565     | 1.473    | 2.124     | 0.947               | 0.801     |
| DJF    | GBV   | 0.813          | 0.754     | 2.774    | 3.405     | 0.953               | 0.909     |
| MAM    | GBV   | 0.936          | 0.937     | 2.362    | 2.208     | 0.962               | 0.970     |
| JJA    | GBV   | 0.853          | 0.804     | 2.644    | 3.017     | 0.856               | 0.740     |
| SON    | GBV   | 0.925          | 0.918     | 2.252    | 2.340     | 0.967               | 0.964     |
| DJF    | SFB   | 0.186          | 0.284     | 1.776    | 2.050     | 0.877               | 0.887     |
| MAM    | SFB   | 0.913          | 0.633     | 1.515    | 2.079     | 0.976               | 0.942     |
| JJA    | SFB   | 0.744          | 0.496     | 1.939    | 3.104     | 0.924               | 0.768     |
| SON    | SFB   | 0.951          | 0.629     | 1.408    | 1.986     | 0.982               | 0.849     |
| DJF    | SS    | 0.497          | 0.727     | 1.865    | 2.196     | 0.876               | 0.902     |
| MAM    | SS    | 0.994          | 0.910     | 1.290    | 1.677     | 0.996               | 0.965     |
| JJA    | SS    | 0.680          | 0.391     | 2.584    | 2.636     | 0.791               | 0.684     |
| SON    | SS    | 0.992          | 0.769     | 1.594    | 3.044     | 0.996               | 0.865     |
| DJF    | NEP   | 0.813          | 0.763     | 1.464    | 1.817     | 0.947               | 0.898     |
| MAM    | NEP   | 0.927          | 0.929     | 2.140    | 1.968     | 0.969               | 0.977     |
| JJA    | NEP   | 0.743          | 0.597     | 2.093    | 2.520     | 0.861               | 0.769     |
| SON    | NEP   | 0.988          | 0.937     | 1.542    | 1.837     | 0.994               | 0.973     |
| DJF    | MD    | 0.992          | 0.904     | 1.376    | 1.273     | 0.996               | 0.972     |
| MAM    | MD    | 0.970          | 0.922     | 1.620    | 1.884     | 0.982               | 0.969     |
| JJA    | MD    | 0.958          | 0.746     | 1.996    | 2.844     | 0.960               | 0.729     |
| SON    | MD    | 0.949          | 0.824     | 1.906    | 2.560     | 0.966               | 0.884     |
| DJF    | MC    | 0.983          | 0.945     | 1.616    | 1.756     | 0.983               | 0.952     |
| MAM    | MC    | 0.966          | 0.992     | 1.878    | 1.767     | 0.978               | 0.996     |
| JJA    | MC    | 0.899          | 0.830     | 2.130    | 2.396     | 0.894               | 0.835     |
| SON    | MC    | 0.983          | 0.963     | 1.818    | 1.819     | 0.987               | 0.978     |
| DJF    | NC    | 0.891          | 0.751     | 1.451    | 1.897     | 0.963               | 0.919     |
| MAM    | NC    | 0.677          | 0.649     | 3.479    | 3.174     | 0.872               | 0.912     |
| JJA    | NC    | 0.632          | 0.631     | 2.602    | 2.922     | 0.747               | 0.630     |
| SON    | NC    | 0.949          | 0.876     | 1.768    | 1.874     | 0.976               | 0.952     |
